# Supplementary material for: Impact of Mutations in Arabidopsis thaliana Metabolic Pathways on Polerovirus Accumulation, Aphid Performance, and Feeding Behavior
Source: MDPI journal article supplement (doi:10.3390/v12020146), 2020-01-27
Supplement: s1 [file s1]

Table S1 : Primer sequences

| <i>A. thaliana</i><br>mutant | Germplasm name | Mutated gene | Primer sequences used to detect mutation |                              | Primer sequences used to detect wild type allele |                              |
|------------------------------|----------------|--------------|------------------------------------------|------------------------------|--------------------------------------------------|------------------------------|
| <i>xth33</i>                 | CS16546        | AT1G10550    | Sense                                    | GAACAGCCACTTAACTCCACG        | Sense                                            | GAACAGCCACTTAACTCCACG        |
|                              |                |              | Antisense                                | TGGTTCACGTAGTGGGCCATCG       | Antisense                                        | CAGTGCAAGACTCAAGCTTCC        |
| <i>nata1</i>                 | GK256F07       | AT2G39030    | Sense                                    | GGGCTACACTGAATTGGTAGCTC      | Sense                                            | ATTTTCCAAGAAGAGGGATCG        |
|                              |                |              | Antisense                                | ACTTTAAAGGACCGATCGCTC        | Antisense                                        | ACTTTAAAGGACCGATCGCTC        |
| <i>pad4-1</i>                | N3806          | AT3G52430    | Sense                                    | TAGCTACCAAGCTGGTGTTCGTTAG    | Sense                                            | TAGCTACCAAGCTGGTGTTCGTTAG    |
|                              |                |              | Antisense                                | CATTTTGCACTTGAACCTTTTCAGATTC | Antisense                                        | CATTTTGCACTTGAACCTTTTCAGATTC |
| <i>atr1D</i>                 | 1005959182     | AT4G24520    | Sense                                    | CGGACAAGAGCATCAGAAC          |                                                  |                              |
|                              |                |              | Antisense                                | GAGAATTGAATAGAGCGTCTG        |                                                  |                              |
