# Supplementary material for: Impact of Mutations in Arabidopsis thaliana Metabolic Pathways on Polerovirus Accumulation, Aphid Performance, and Feeding Behavior
Source: MDPI journal article supplement (doi:10.3390/v12020146), 2020-01-27
Supplement: s1 [file s1]

**Table S2.** TuYV infection of *A. thaliana* mutants lines.

| <i>A. thaliana</i> line | nb inf. plants/total inoc.<br>(% inf. plants) <sup>1</sup> |
|-------------------------|------------------------------------------------------------|
| <b>Col-0</b>            | 132/167 <b>(79%)</b>                                       |
| <i>xth33-1</i>          | 45/60 <b>(75%)</b>                                         |
| <i>ss3-2</i>            | 48/75 <b>(64%)</b>                                         |
| <i>nata1</i>            | 24/46 <b>(52%)</b>                                         |
| <i>atr1D</i>            | 19/25 <b>(76%)</b>                                         |
| <i>quad</i>             | 125/146 <b>(86%)</b>                                       |
| <i>myc234</i>           | 71/97 <b>(73%)</b>                                         |
| <i>pad4-1</i>           | 48/66 <b>(73%)</b>                                         |

<sup>1</sup>Thirteen independent experiments have been performed. The ratios represent the sum of the number of infected plants/total plants inoculated with viruliferous aphids. In brackets, the percentage of infected plants is indicated. A plant is considered infected when the OD value of the DAS-ELISA test is above twice the mean OD values of three non-infected plants and three times the standard deviation of these values.
