# Supplementary material for: Impact of Mutations in Arabidopsis thaliana Metabolic Pathways on Polerovirus Accumulation, Aphid Performance, and Feeding Behavior
Source: MDPI journal article supplement (doi:10.3390/v12020146), 2020-01-27
Supplement: s1 [file s1]

**Table S4.** TuYV accumulation measured by ELISA in infected *A. thaliana* mutants *quad*, *atr1D* and *myc234* plants used as virus source in virus transmission experiments (Exp. 2 & 3 Table 3).

| Experiment <sup>1</sup> | Virus source plant | DAS-ELISA OD of infected plants <sup>2</sup> | Mean OD +/- SE <sup>3</sup> |
|-------------------------|--------------------|----------------------------------------------|-----------------------------|
| Exp. 2                  | <i>quad</i> # 1    | 0.57                                         | 0.59 ± 0.01                 |
|                         | <i>quad</i> # 2    | 0.62                                         |                             |
|                         | <i>quad</i> # 3    | 0.59                                         |                             |
|                         | <i>atr1D</i> # 1   | 0.41                                         | 0.38 ± 0.03                 |
|                         | <i>atr1D</i> # 2   | 0.31                                         |                             |
|                         | <i>atr1D</i> # 3   | 0.41                                         |                             |
|                         | Col-0 # 1          | 0.44                                         | 0.45 ± 0.00                 |
|                         | Col-0 # 2          | 0.45                                         |                             |
|                         | Col-0 # 3          | 0.45                                         |                             |
| Exp. 3                  | <i>myc234</i> # 1  | 1.24                                         | /                           |
|                         | Col-0 # 1          | 1.82                                         | /                           |

<sup>1</sup>The experiments are those mentioned in Table 3.

<sup>2</sup>DAS-ELISA OD value at 405 nm 1 h after substrate incubation. The mean OD value of three non-infected Col-0 is 0.09 ± 0.005 for exp. 2 and 0.153 ± 0.004 for exp. 3.

<sup>3</sup>Mean DAS-ELISA OD value +/- Standard Error.
