# Supplementary material for: Impact of Mutations in Arabidopsis thaliana Metabolic Pathways on Polerovirus Accumulation, Aphid Performance, and Feeding Behavior
Source: MDPI journal article supplement (doi:10.3390/v12020146), 2020-01-27
Supplement: s1 [file s1]

**Table S5.** TuYV titer measured by qRT-PCR in infected *A. thaliana* mutants *quad*, *pad4-1* and *atr1D* plants used as virus source in a virus transmission experiment (Exp. 4 Table 3).

| <i>A. thaliana</i><br>mutant plants | TuYV genome copies/ng<br>total RNA $\pm$ SE <sup>1</sup> | Mean TuYV genome<br>copies/ng total RNA $\pm$ SE |
|-------------------------------------|----------------------------------------------------------|--------------------------------------------------|
| <i>quad</i> # 1                     | 3.23E+05 $\pm$ 2.01E+04                                  | 3.80E+05 $\pm$ 5.24E+04                          |
| <i>quad</i> # 2                     | 4.85E+05 $\pm$ 6.11E+04                                  |                                                  |
| <i>quad</i> # 3                     | 3.33E+05 $\pm$ 1.56E+04                                  |                                                  |
| <i>pad4-1</i> # 1                   | 3.82E+05 $\pm$ 1.79E+04                                  | 3.74E+05 $\pm$ 0.82E+04                          |
| <i>pad4-1</i> # 2                   | 3.58E+05 $\pm$ 1.82E+04                                  |                                                  |
| <i>pad4-1</i> # 3                   | 3.83E+05 $\pm$ 2.98E+04                                  |                                                  |
| <i>atr1D</i> # 1                    | 4.39E+05 $\pm$ 2.62E+04                                  | 4.32E+05 $\pm$ 0.44E+04                          |
| <i>atr1D</i> # 2                    | 4.24E+05 $\pm$ 2.10E+04                                  |                                                  |
| <i>atr1D</i> # 3                    | 4.34E+05 $\pm$ 1.36E+04                                  |                                                  |
| Col-0 # 1                           | 5.06E+05 $\pm$ 4.35E+04                                  | 3.70E+05 $\pm$ 6.82E+04                          |
| Col-0 # 2                           | 2.92E+05 $\pm$ 2.02E+04                                  |                                                  |
| Col-0 # 3                           | 3.12E+05 $\pm$ 5.49E+03                                  |                                                  |

<sup>1</sup>TuYV genome copies in each plant sample analyzed by qRT-PCR  $\pm$  Standard Error of technical triplicates.
