# Supplementary material for: Impact of Mutations in Arabidopsis thaliana Metabolic Pathways on Polerovirus Accumulation, Aphid Performance, and Feeding Behavior
Source: MDPI journal article supplement (doi:10.3390/v12020146), 2020-01-27
Supplement: s1 [file s1]

**Table S3.** TuYV titer measured by qRT-PCR in infected *A. thaliana* mutants *quad*, *pad4-1* and *atr1D* plants used as virus source in a virus transmission experiment (Exp. 1 Table 3).

| <i>A. thaliana</i><br>mutant plants | TuYV genome copies/ng<br>total RNA $\pm$ SE <sup>1</sup> | Mean TuYV genome<br>copies/ng total RNA $\pm$ SE |
|-------------------------------------|----------------------------------------------------------|--------------------------------------------------|
| <i>quad</i> # 1                     | 4.74E+05 $\pm$ 2.88E+04                                  | 4.43E+05 $\pm$ 1.58E+04                          |
| <i>quad</i> # 2                     | 4.22E+05 $\pm$ 2.52E+04                                  |                                                  |
| <i>quad</i> # 3                     | 4.33E+05 $\pm$ 4.38E+04                                  |                                                  |
| <i>pad4-1</i> # 1                   | 4.35E+05 $\pm$ 3.84E+04                                  | 4.23E+05 $\pm$ 2.19E+04                          |
| <i>pad4-1</i> # 2                   | 3.81E+05 $\pm$ 1.54E+04                                  |                                                  |
| <i>pad4-1</i> # 3                   | 4.54E+05 $\pm$ 1.42E+04                                  |                                                  |
| <i>atr1D</i> # 1                    | 7.37E+05 $\pm$ 2.70E+04                                  | 4.78E+05 $\pm$ 1.29E+05                          |
| <i>atr1D</i> # 2                    | 3.43E+05 $\pm$ 9.45E+03                                  |                                                  |
| <i>atr1D</i> # 3                    | 3.54E+05 $\pm$ 2.92E+04                                  |                                                  |
| Col-0 # 1                           | 6.21E+05 $\pm$ 2.75E+04                                  | 6.15E+05 $\pm$ 2.35E+04                          |
| Col-0 # 2                           | 6.53E+05 $\pm$ 1.49E+04                                  |                                                  |
| Col-0 # 3                           | 5.72E+05 $\pm$ 2.82E+04                                  |                                                  |

<sup>1</sup>TuYV genome copies in each plant sample analyzed by qRT-PCR  $\pm$  Standard Error of technical triplicates.
