# Supplementary material for: Impact of Mutations in Arabidopsis thaliana Metabolic Pathways on Polerovirus Accumulation, Aphid Performance, and Feeding Behavior
Source: Viruses. 2020 Jan 27;12(2):146. doi: 10.3390/v12020146 (PMC7077285; doi:10.3390/v12020146)
Supplement: Supplementary file 1 [file viruses-12-00146-s001.zip]

Archive with 5 entries (5 files):
- Table S1 Bogaert et al Viruses.pdf
- Table S2 Bogaert et al Viruses.pdf
- Table S3 Bogaert et al Viruses.pdf
- Table S4 Bogaert et al Viruses.pdf
- Table S5 Bogaert et al Viruses.pdf
